# Supplementary material for: Genetic Heterogeneity among Chicken Infectious Anemia Viruses Detected in Italian Fowl
Source: PubMed Central journal article supplement (PMC8067058; doi:10.3390/ani11040944), 2021-03-27
Supplement: animals-11-00944-s001.pdf [file animals-11-00944-s001.pdf]

**Table S1** Reference strains retrieved from the GenBank database included in the recombination analysis.

| <b>CIAV strain</b> | <b>Country</b> | <b>GenBank Accession N°</b> |
|--------------------|----------------|-----------------------------|
| Del-Ros            | USA            | AF313470                    |
| 26P4               | USA            | D10068                      |
| Cux-1              | Germany        | M55918                      |
| Cuxhaven 1         | Germany        | M81223                      |
| CAU269-7           | Australia      | AF227982                    |
| 3711               | Australia      | EF683159                    |
| BD-3               | Bangladesh     | AF395114                    |
| 98D02152           | USA            | AF311892                    |
| Isolate 4          | Taiwan         | KJ728816                    |
| Isolate 6          | Taiwan         | KJ728817                    |
| Isolate 8          | Taiwan         | KJ728819                    |
| Isolate 7          | Taiwan         | KJ728818                    |
| Isolate 9          | Taiwan         | KJ728820                    |
| Isolate 18         | Taiwan         | KJ728827                    |
| Isolate 20         | Taiwan         | KJ728829                    |
| CAV-EG-2           | Egypt          | MH001553                    |
| CAV-EG-4           | Egypt          | MH001554                    |
| CAV-EG-6           | Egypt          | MH001555                    |
| CAV-EG-7           | Egypt          | MH001556                    |
| CAV-EG-10          | Egypt          | MH001557                    |
| CAV-EG-11          | Egypt          | MH001559                    |
| CAV-EG-13          | Egypt          | MH001560                    |
| CAV-EG-14          | Egypt          | MH001565                    |
| CAV-EG-15          | Egypt          | MH001568                    |
| CAV-EG-21          | Egypt          | MH001567                    |
| CAV-EG-23          | Egypt          | MH001562                    |
| CAV-EG-25          | Egypt          | MH001569                    |
| CAV-EG-26          | Egypt          | MH001564                    |
| CAV-EG-28          | Egypt          | MH001570                    |
| TR20               | Japan          | AB027470                    |
| N5                 | China          | MK887167                    |
| G17.33.3           | Vietnam        | MH536104                    |
| HB1517             | China          | KU645516                    |
| AH6                | China          | DQ124935                    |
| HLJ15108           | China          | KY486137                    |
| LF4                | China          | AY839944                    |
| SD1514             | China          | KU645521                    |
| 704                | Australia      | U65414                      |
| 98D06073           | USA            | AF311900                    |
| 1102PT01           | Taiwan         | KY888892                    |
| 1103TN02           | Taiwan         | KY888894                    |
| SD22               | China          | DQ141673                    |
| SD24               | China          | AY999018                    |
| 01-4201            | USA            | DQ991394                    |
| 17JL0310           | China          | MK089241                    |
| 3-1P60             | Malaysia       | AY040632                    |
| 1504TW             | Taiwan         | MK358456                    |
| 1535TW             | Taiwan         | MN299315                    |

N.A. Not

available

|                    |             |          |
|--------------------|-------------|----------|
| 1637TW             | Taiwan      | MN299310 |
| 1852TW             | Taiwan      | MN299316 |
| A2                 | Japan       | AB031296 |
| AH4                | China       | DQ124936 |
| C14                | China       | EF176599 |
| CAV/NAM/TANUVAS/09 | India       | KY053900 |
| CAV-10             | Argentina   | KJ872513 |
| CAV-18             | Argentina   | KJ872514 |
| CAV-CA1-2015       | Egypt       | MG827098 |
| CAV-SK4-2017       | Egypt       | MG827100 |
| XH16               | China       | MK770259 |
| N.A.               | China       | AF475908 |
| ClAV89-69          | South Korea | JF507715 |
| ClAV-Mouse         | China       | KU645525 |
| G17.33.3           | Vietnam     | MH536104 |
| G6                 | Japan       | AB119448 |
| GD-102             | China       | KU050677 |
| GD-K-12            | China       | KF224935 |
| GX1904A            | China       | MN103402 |
| GX1804             | China       | MK484615 |
| HB1517             | China       | KU645516 |
| HLJ14101           | China       | KY486136 |
| HN1504             | China       | KU645512 |
| JL14028            | China       | KY486148 |
| LN1402             | China       | KU645511 |
| LY-1               | China       | KX447636 |
| SD1403             | China       | KU221054 |
| SD1505             | China       | KU645523 |
| SD1511             | China       | KU641015 |
| SD1514             | China       | KU645521 |
| SD1518             | China       | KU645522 |
| SH11               | China       | DQ141670 |
| SH16               | China       | DQ141671 |
| HN9                | China       | DQ141672 |
| TJBD33             | China       | AY843527 |
| SDLY08             | China       | FJ172347 |
| 17SY0902           | China       | MK089243 |
| SMSC-1             | Malaysia    | AF285882 |
| SMSC-1P9WT         | Malaysia    | DQ217400 |
| SMSC-1P123WT       | Malaysia    | DQ217401 |
